# Supplementary material for: Research on the Low-Temperature Impact Toughness of a New 100-mm Ultra-Thick Offshore Steel Fabricated Using the Narrow-Gap Laser Wire Filling Welding Process
Source: MDPI journal article supplement (doi:10.3390/ma17061363), 2024-03-16
Supplement: s1 [file s1]

Table S1. Welding parameters

| Layers | Laser Power<br>(kW) | Welding Speed<br>(mm/min) | Wire Feed Speed<br>(m/min) | Defocus Amount<br>(mm) | Wobble Frequency<br>(Hz) | Wobble Amplitude<br>(mm) |
|--------|---------------------|---------------------------|----------------------------|------------------------|--------------------------|--------------------------|
| 1-1    | 3000                | 300                       | 0                          | +15                    | 200                      | 3                        |
| 2-1    | 3000                | 300                       | 0                          | +15                    | 200                      | 3                        |
| 1-2    | 3300                | 300                       | 3                          | +15                    | 200                      | 3.2                      |
| 2-2    | 3300                | 300                       | 3                          | +15                    | 200                      | 3.2                      |
| 1-3    | 3300                | 300                       | 3                          | +15                    | 200                      | 3.2                      |
| 2-3    | 3300                | 300                       | 3                          | +15                    | 200                      | 3.2                      |
| 1-4    | 3300                | 300                       | 3                          | +15                    | 200                      | 3.2                      |
| 2-4    | 3300                | 300                       | 3                          | +15                    | 200                      | 3.2                      |
| 1-5    | 3300                | 300                       | 3                          | +15                    | 200                      | 3.5                      |
| 2-5    | 3300                | 300                       | 3                          | +15                    | 200                      | 3.5                      |
| 1-6    | 3300                | 300                       | 3                          | +15                    | 200                      | 3.5                      |
| 2-6    | 3300                | 300                       | 3                          | +15                    | 200                      | 3.5                      |
| 1-7    | 3300                | 300                       | 3                          | +15                    | 200                      | 3.5                      |
| 2-7    | 3300                | 300                       | 3                          | +15                    | 200                      | 3.5                      |
| 1-8    | 3300                | 300                       | 3                          | +15                    | 200                      | 3.5                      |
| 2-8    | 3300                | 300                       | 3                          | +15                    | 200                      | 3.5                      |
| 1-9    | 3300                | 300                       | 3                          | +15                    | 200                      | 3.5                      |
| 2-9    | 3300                | 300                       | 3                          | +15                    | 200                      | 3.5                      |
| 1-10   | 3500                | 300                       | 3                          | +15                    | 200                      | 3.8                      |
| 2-10   | 3500                | 300                       | 3                          | +15                    | 200                      | 3.8                      |
| 1-11   | 3500                | 300                       | 3                          | +15                    | 200                      | 3.8                      |
| 2-11   | 3500                | 300                       | 3                          | +15                    | 200                      | 3.8                      |
| 1-12   | 3500                | 300                       | 3                          | +15                    | 200                      | 3.8                      |
| 2-12   | 3500                | 300                       | 3                          | +15                    | 200                      | 3.8                      |
| 1-13   | 3500                | 300                       | 3                          | +15                    | 200                      | 3.8                      |
| 2-13   | 3500                | 300                       | 3                          | +15                    | 200                      | 3.8                      |
| 1-14   | 3500                | 300                       | 3                          | +15                    | 200                      | 4.0                      |
| 2-14   | 3500                | 300                       | 3                          | +15                    | 200                      | 4.0                      |
| 1-15   | 3500                | 300                       | 3                          | +15                    | 200                      | 4.0                      |
| 2-15   | 3500                | 300                       | 3                          | +15                    | 200                      | 4.0                      |
| 1-16   | 4000                | 300                       | 3                          | +15                    | 200                      | 4.0                      |
| 2-16   | 4000                | 300                       | 3                          | +15                    | 200                      | 4.0                      |
| 1-17   | 4000                | 300                       | 3                          | +15                    | 200                      | 4.0                      |
| 2-17   | 4000                | 300                       | 3                          | +15                    | 200                      | 4.0                      |
| 1-18   | 4000                | 300                       | 3                          | +15                    | 200                      | 4.0                      |
| 2-18   | 4000                | 300                       | 3                          | +15                    | 200                      | 4.0                      |
| 1-19   | 4000                | 300                       | 3                          | +15                    | 200                      | 4.2                      |
| 2-19   | 4000                | 300                       | 3                          | +15                    | 200                      | 4.2                      |
| 1-20   | 4000                | 300                       | 3                          | +15                    | 200                      | 4.2                      |
| 2-20   | 4000                | 300                       | 3                          | +15                    | 200                      | 4.2                      |

| Layers | Laser<br>Power<br>(kW) | Welding<br>Speed<br>(mm/min) | Wire Feed<br>Speed<br>(m/min) | Defocus<br>Amount<br>(mm) | Wobble<br>Frequency<br>(Hz) | Wobble<br>Amplitude<br>(mm) |
|--------|------------------------|------------------------------|-------------------------------|---------------------------|-----------------------------|-----------------------------|
| 1-21   | 4300                   | 300                          | 3                             | +15                       | 200                         | 4.2                         |
| 2-21   | 4300                   | 300                          | 3                             | +15                       | 200                         | 4.2                         |
| 1-22   | 4300                   | 300                          | 3                             | +15                       | 200                         | 4.2                         |
| 2-22   | 4300                   | 300                          | 3                             | +15                       | 200                         | 4.2                         |
| 1-23   | 4300                   | 300                          | 3                             | +15                       | 200                         | 4.4                         |
| 2-23   | 4300                   | 300                          | 3                             | +15                       | 200                         | 4.4                         |
| 1-24   | 4500                   | 300                          | 3                             | +15                       | 200                         | 4.4                         |
| 2-24   | 4500                   | 300                          | 3                             | +15                       | 200                         | 4.4                         |
| 1-25   | 4500                   | 300                          | 3                             | +15                       | 200                         | 4.6                         |
| 2-25   | 4500                   | 300                          | 3                             | +15                       | 200                         | 4.6                         |
